# Supplementary material for: Optimizing the molecular structure of 1,1,7,7-tetramethyl julolidine fused furan based chromophores by introducing a heterocycle ring to achieve high electro-optic activity
Source: Royal Society of Chemistry journal article supplement (doi:10.1039/c9nj02309g), 2019-01-01
Supplement: c9nj02309g1.pdf [file c9nj02309g1.pdf]

## Supporting Information

### Optimizing molecular structure of 1,1,7,7-tetramethyljulolidine fused furan based chromophores by introducing heterocycle ring to achieve a high electro-optic activity

Maolin Zhang<sup>b,#</sup>, Huajun Xu<sup>b,#</sup>, Mingkai Fu<sup>c</sup>, Min Yang<sup>a</sup>, Bing He<sup>a</sup>, Xiaoling Zhang<sup>a</sup>, Zhonghui Li<sup>a</sup>, Guowei Deng<sup>a,\*</sup>, Shuhui Bo<sup>b,\*</sup>, Jialei Liu<sup>b,\*</sup>

<sup>a</sup> College of Chemistry and Life Science, Institute of Functional Molecules, Chengdu Normal University, Chengdu 611130, China. Email : guoweideng86@163.com

<sup>b</sup> Technical Institute of Physics and Chemistry, Chinese Academy of Sciences, Beijing, 100190, China. Email: liujialei@mail.ipc.ac.cn (J. Liu); boshuhui@mail.ipc.ac.cn (S. Bo)

<sup>c</sup> Institute of Electrical Engineering, Chinese Academy of Sciences, Beijing 100190, China

# These authors contributed equally to this work.

#### <sup>1</sup>H and <sup>13</sup>C NMR spectra of compound 2

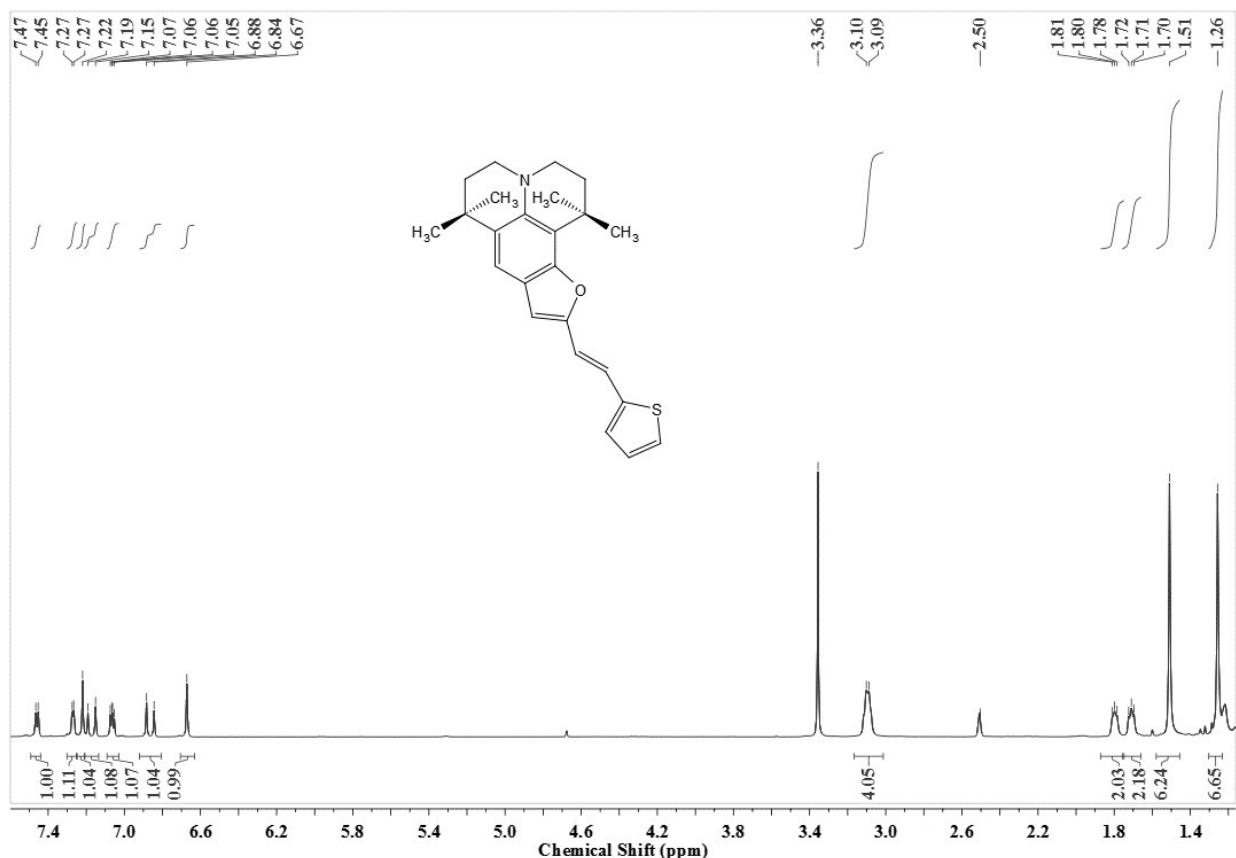

Fig. S1

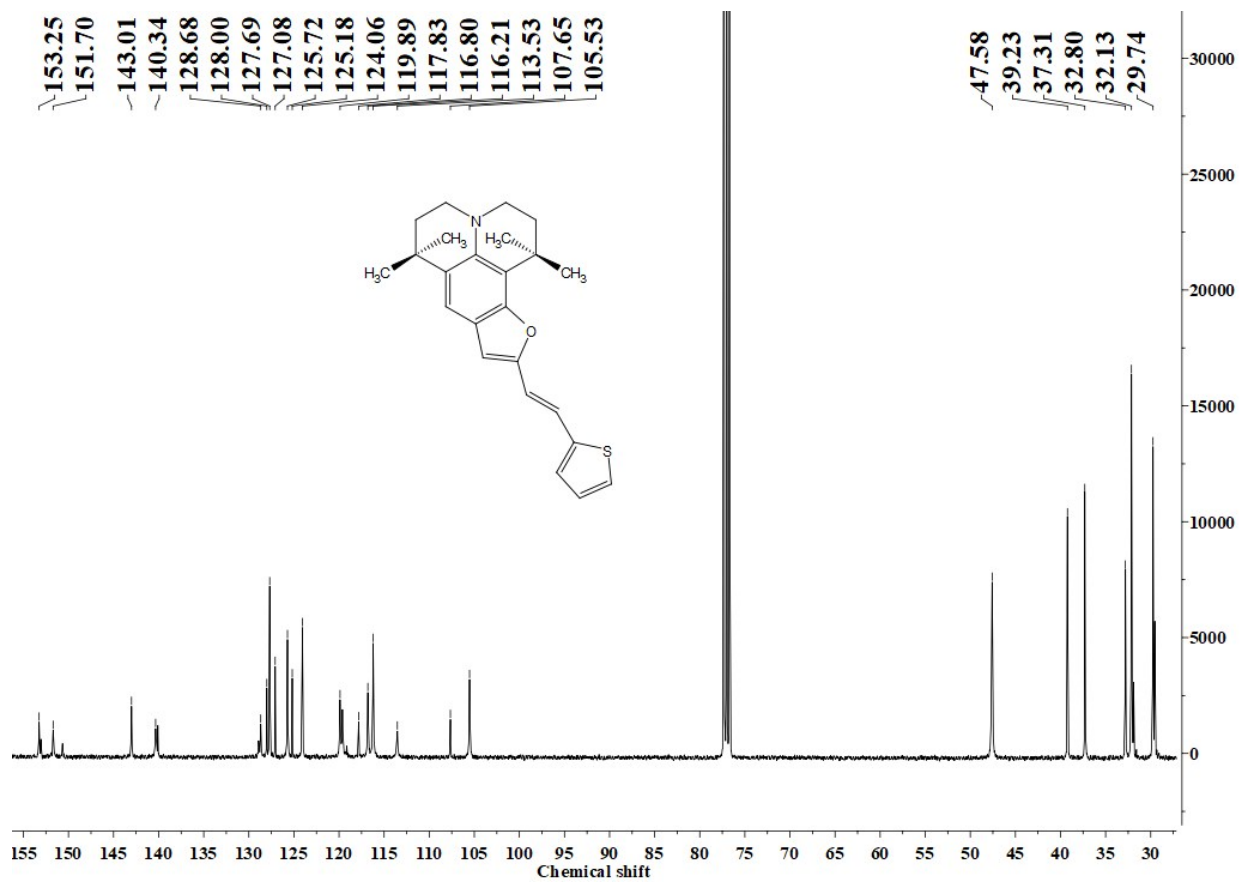

Fig. S2

# <sup>1</sup>H and <sup>13</sup>C NMR spectra of compound 3

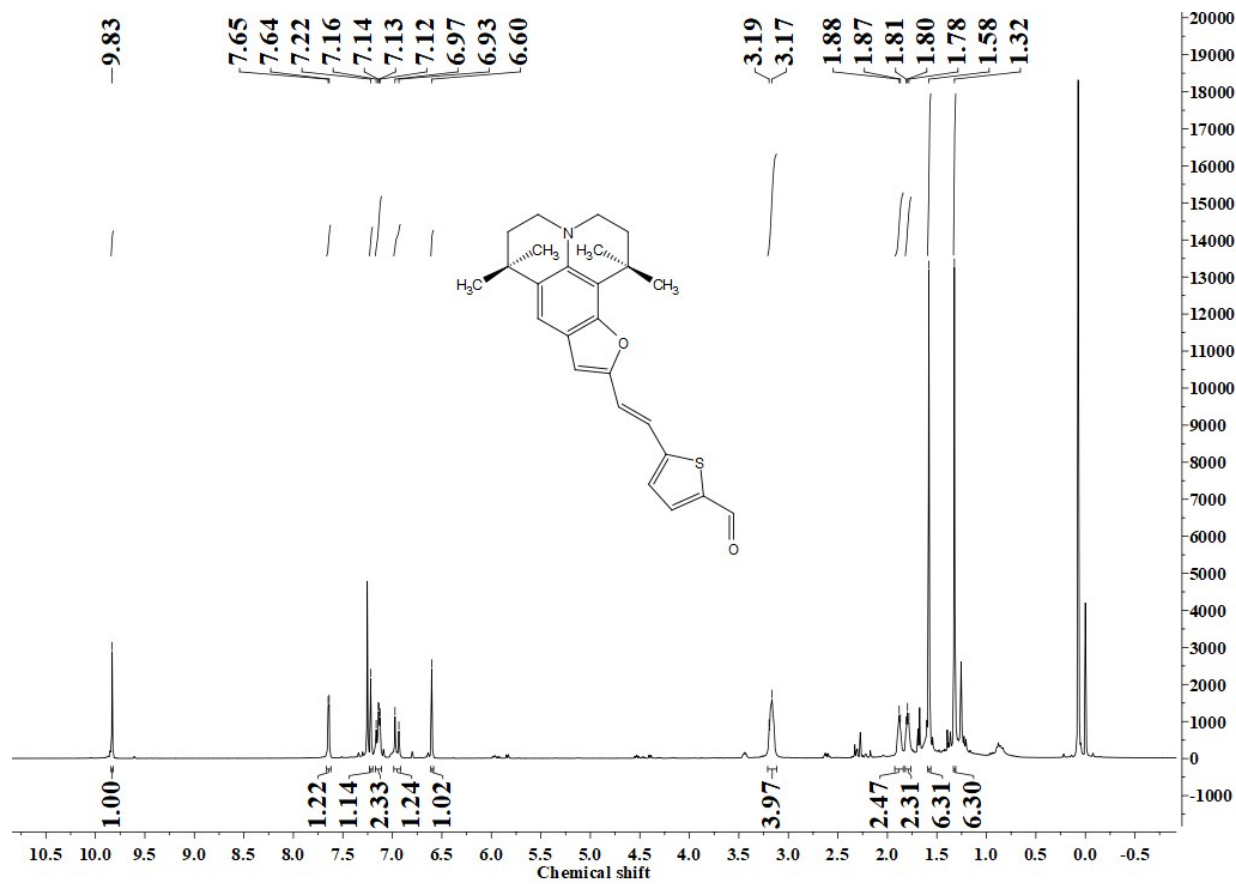

Fig. S3

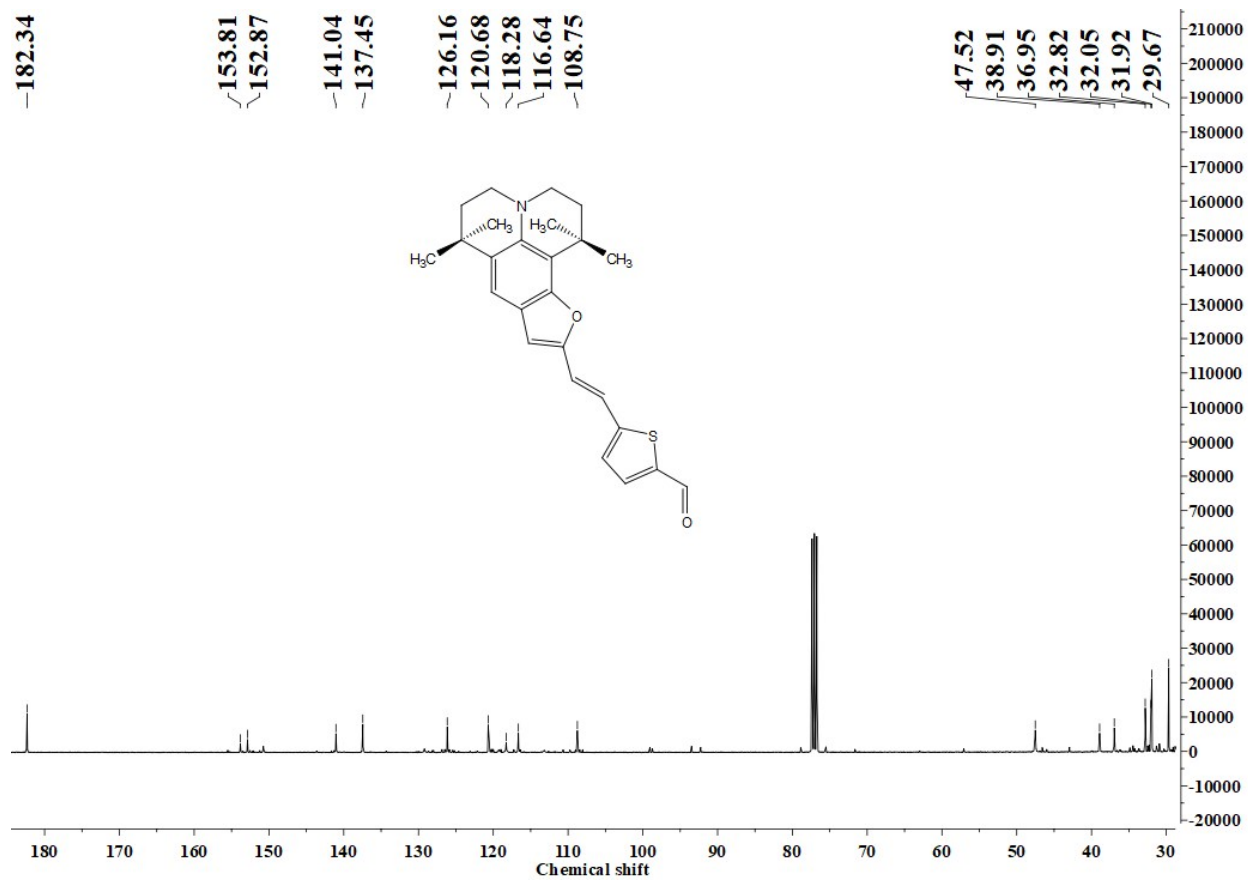

Fig. S4

# $^1\text{H}$ and $^{13}\text{C}$ NMR spectra of Chromophore 2

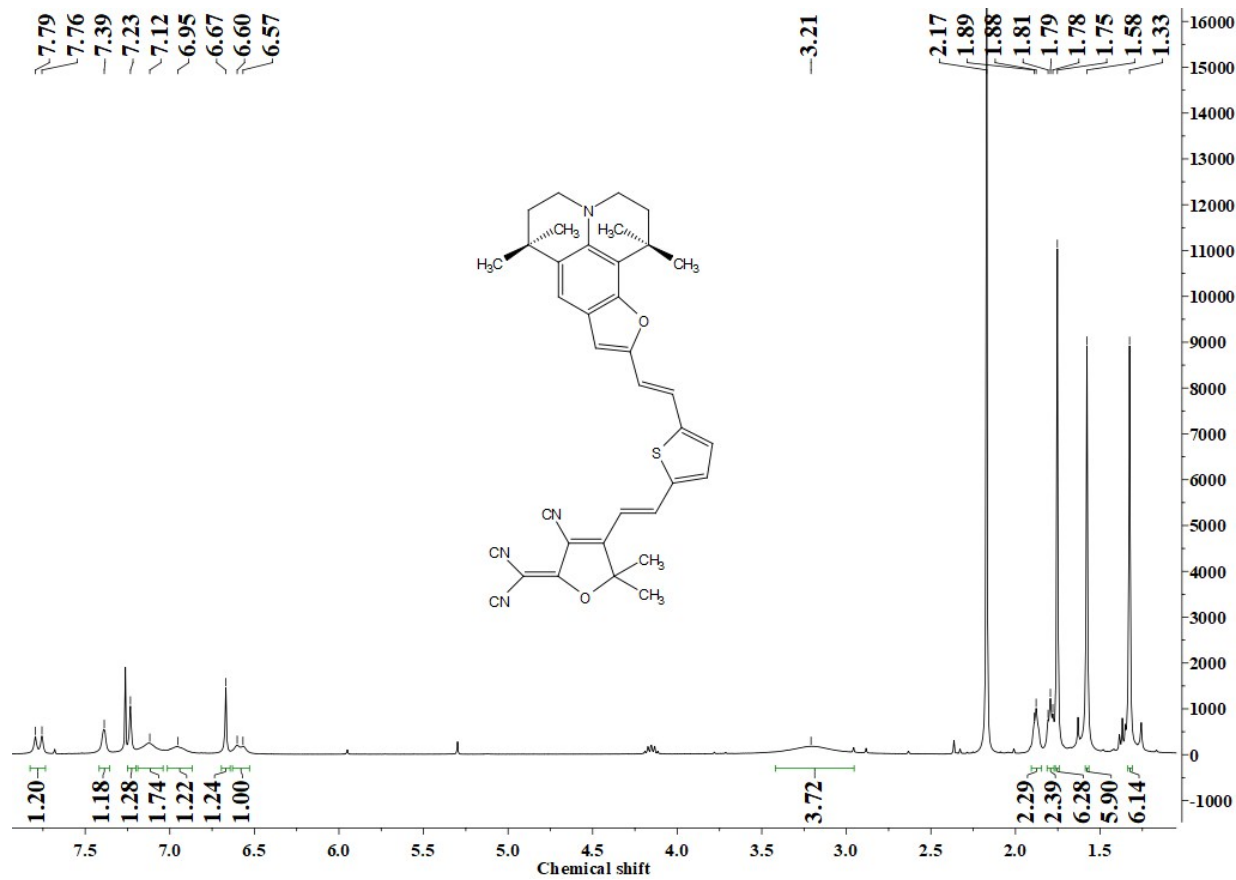

Fig. S5

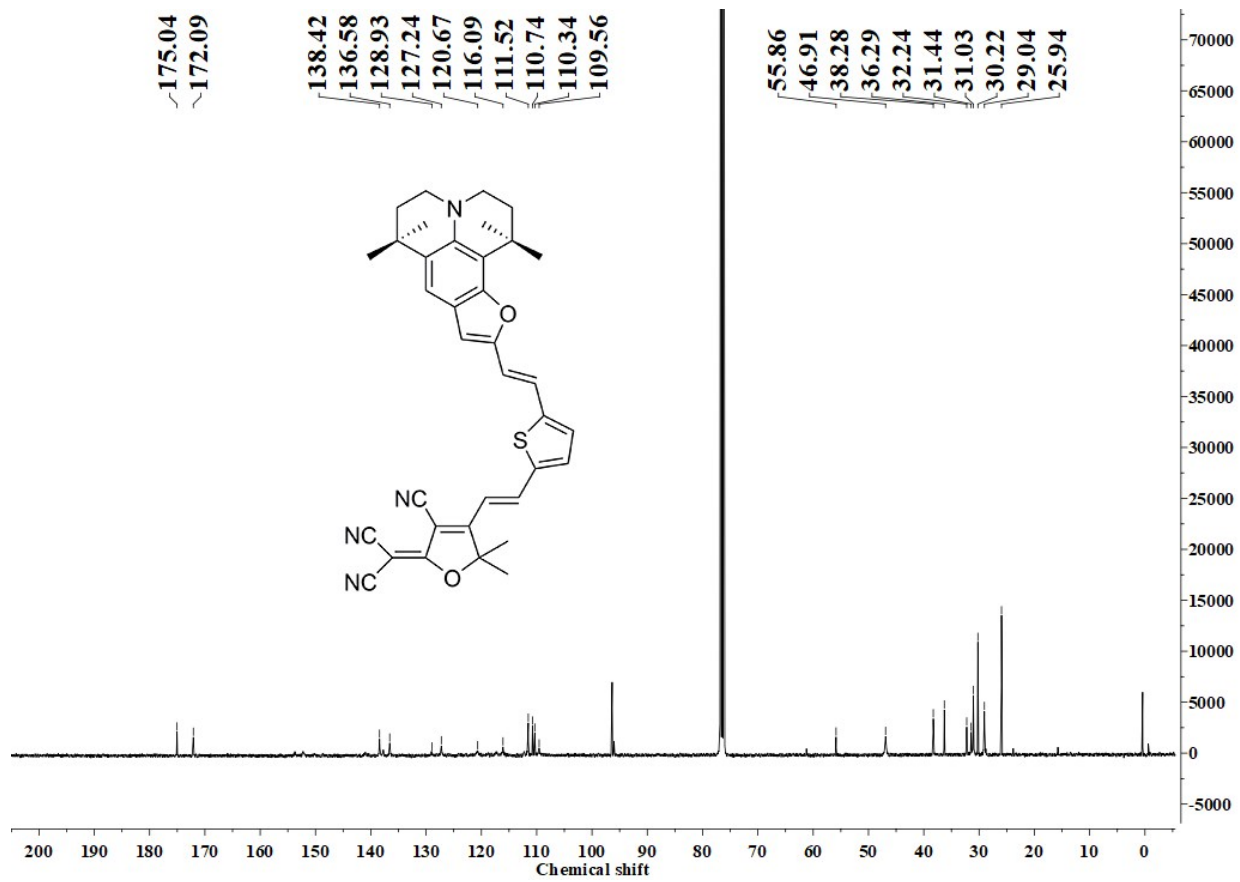

Fig. S6

# $^1\text{H}$ and $^{13}\text{C}$ NMR spectra of compound 4

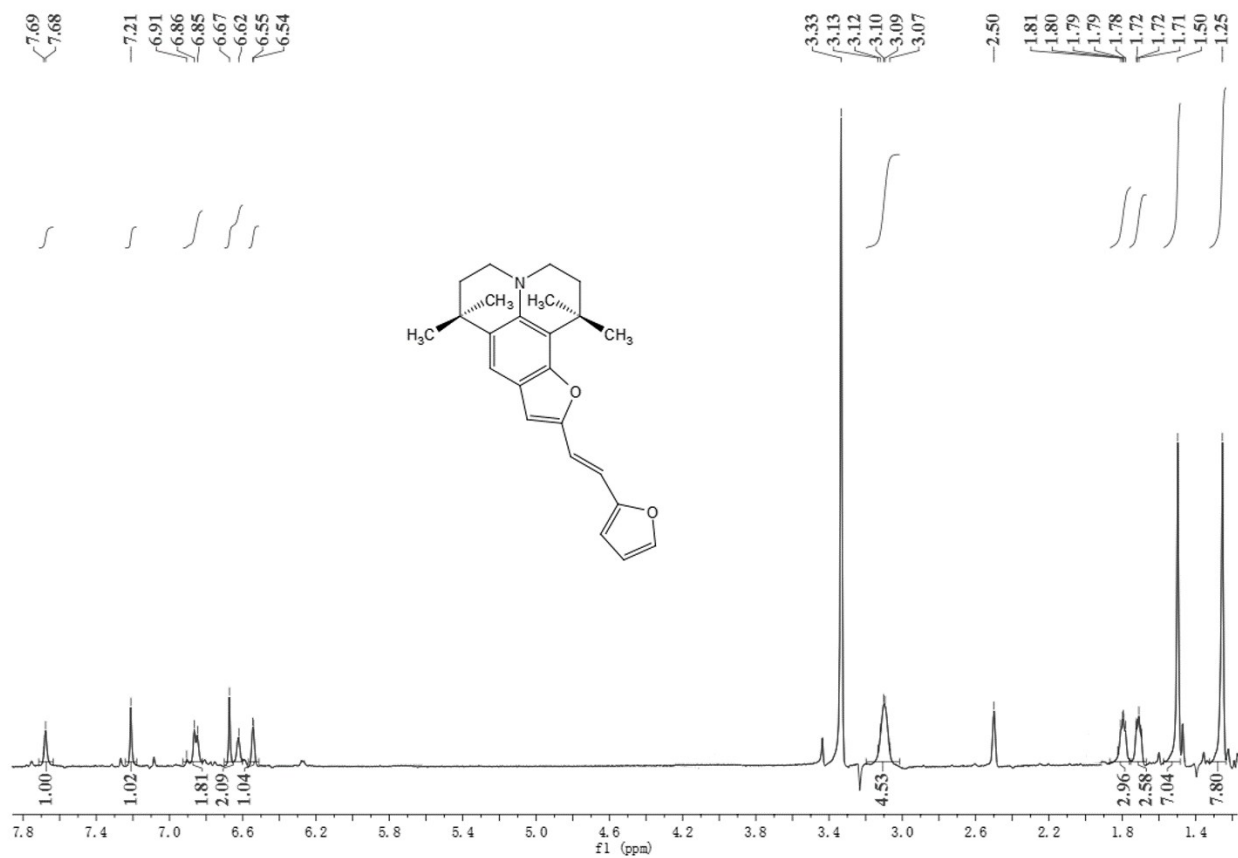

Fig. S7

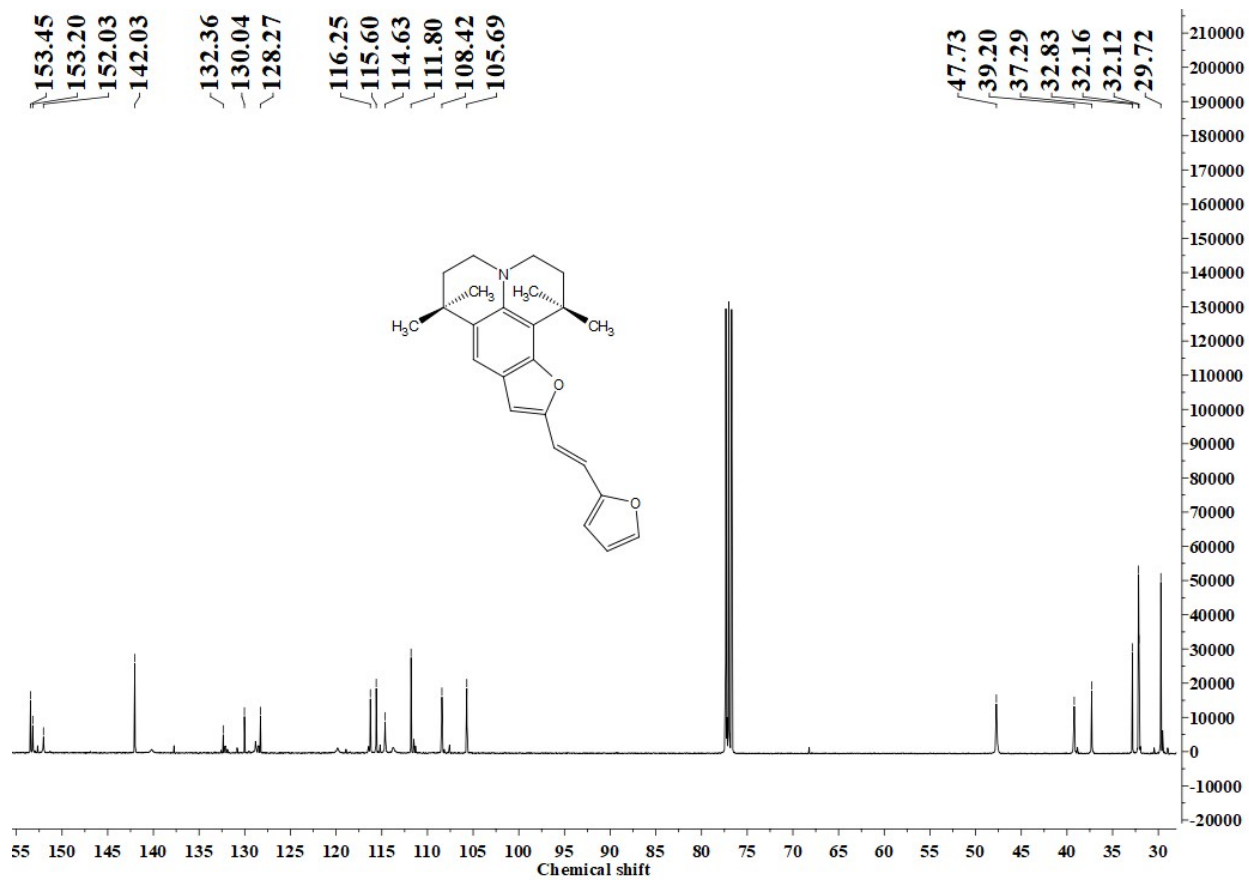

Fig. S8



# $^1\text{H}$ and $^{13}\text{C}$ NMR spectra of compound 5

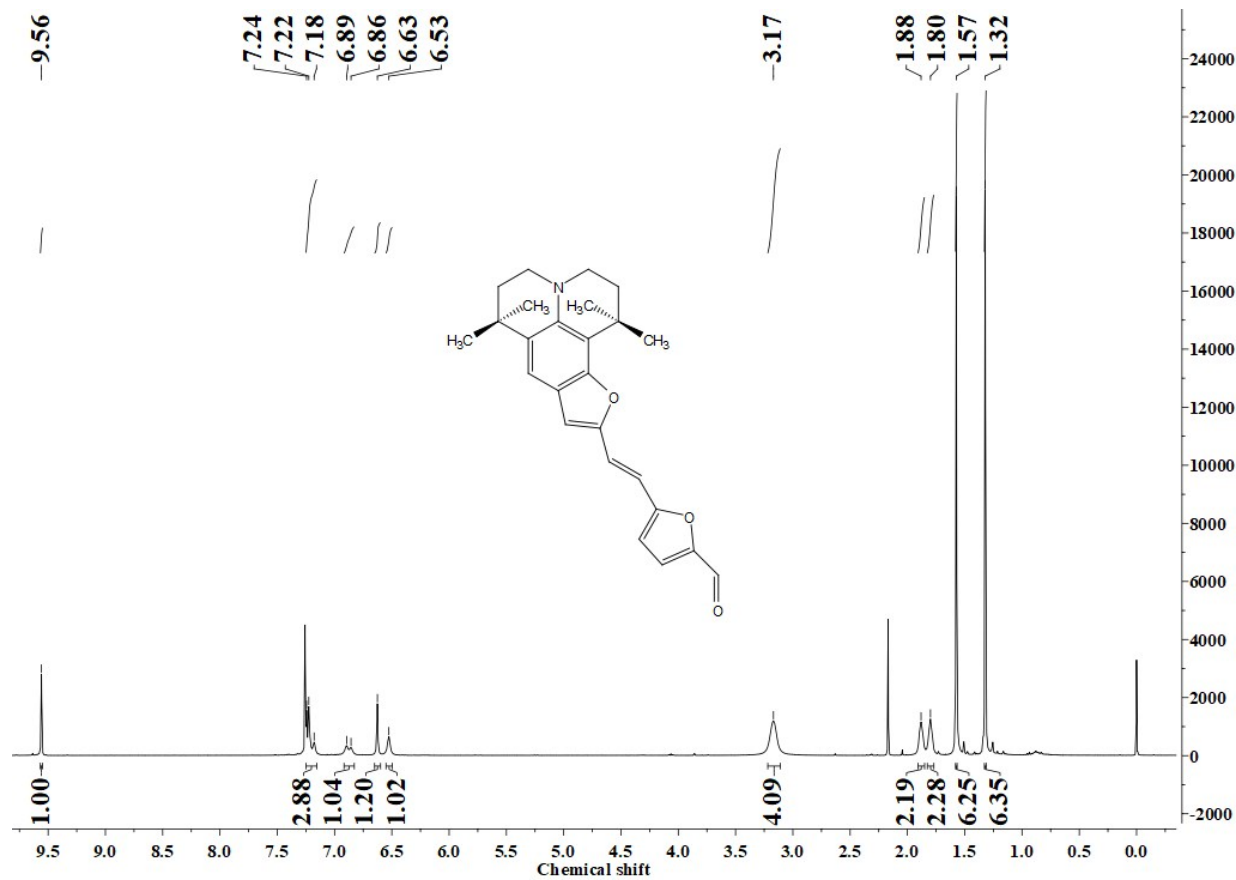

Fig. S9

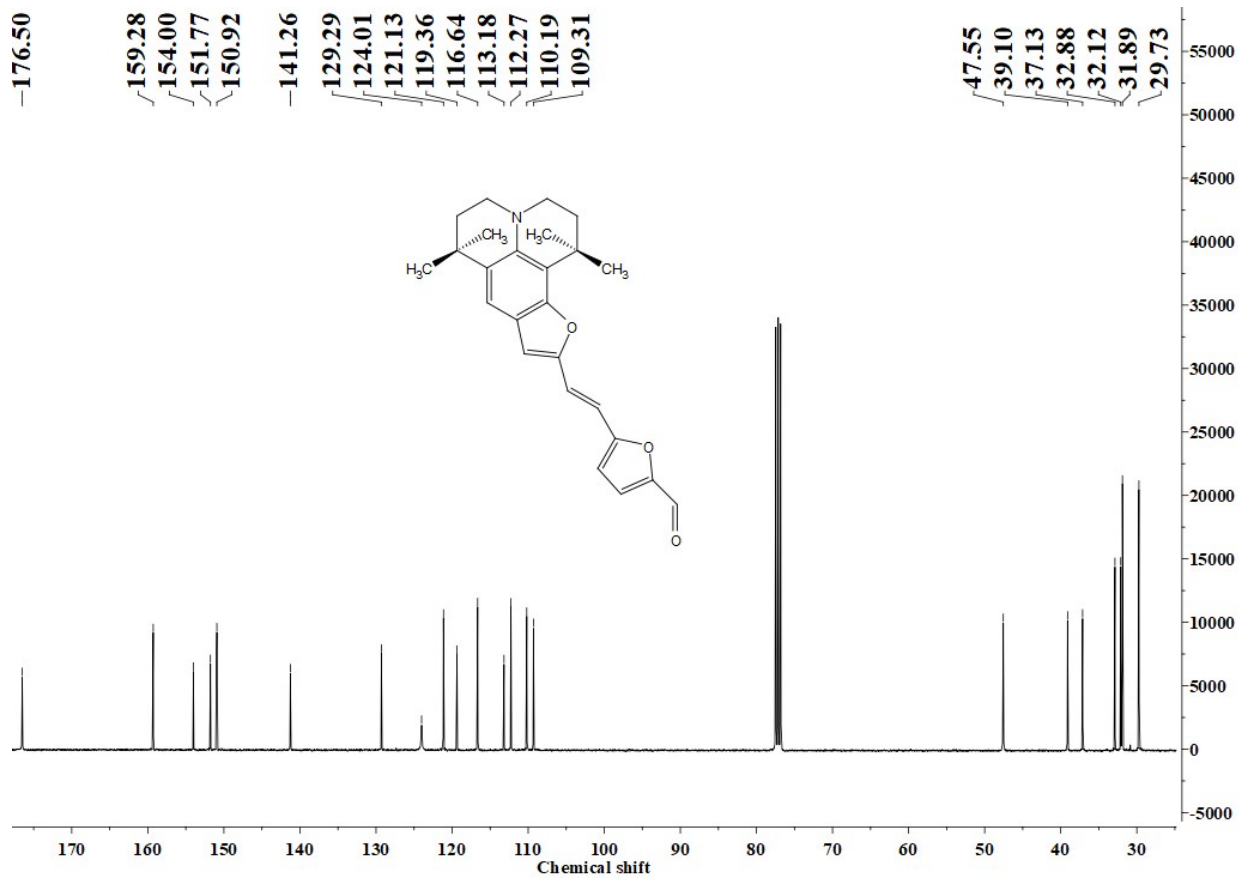

Fig. S10

# <sup>1</sup>H and <sup>13</sup>C NMR spectra of Chromophore 1

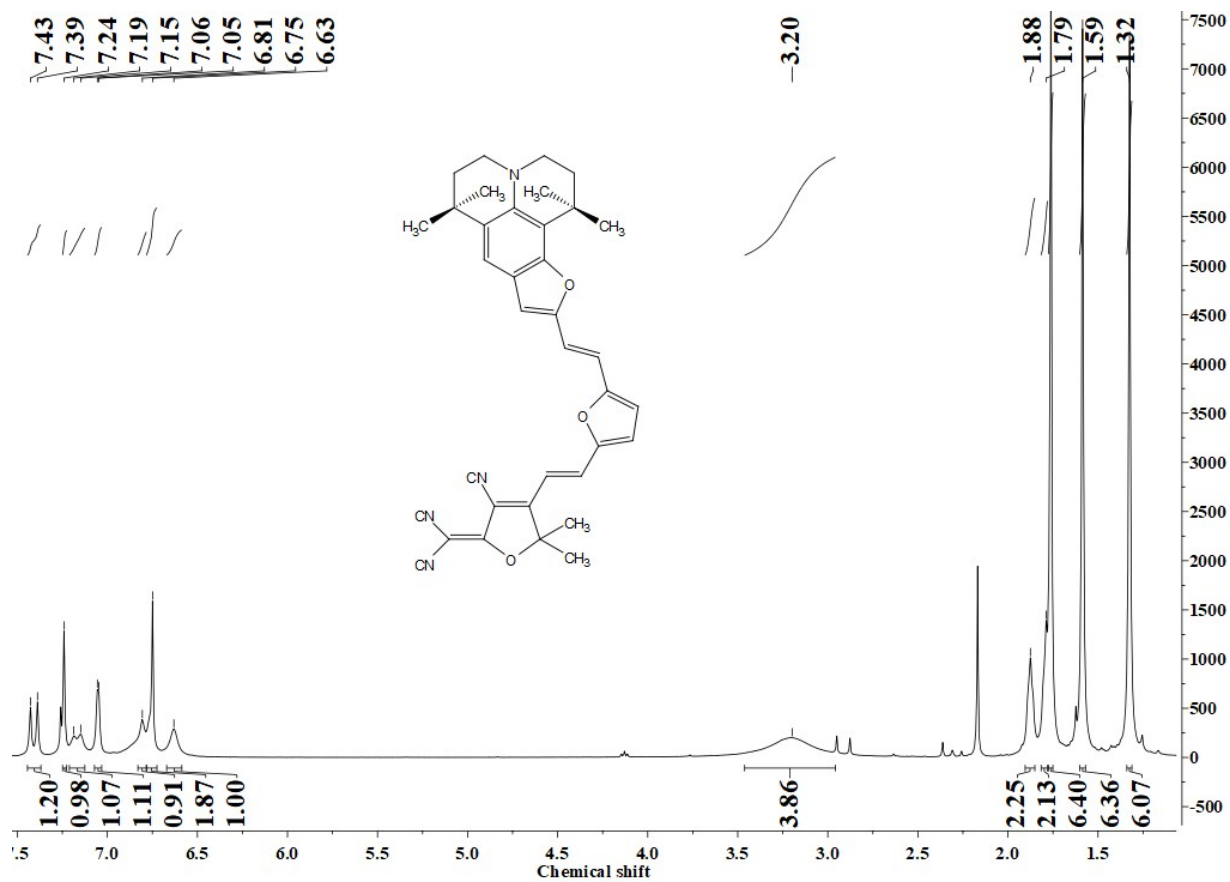

Fig. S11

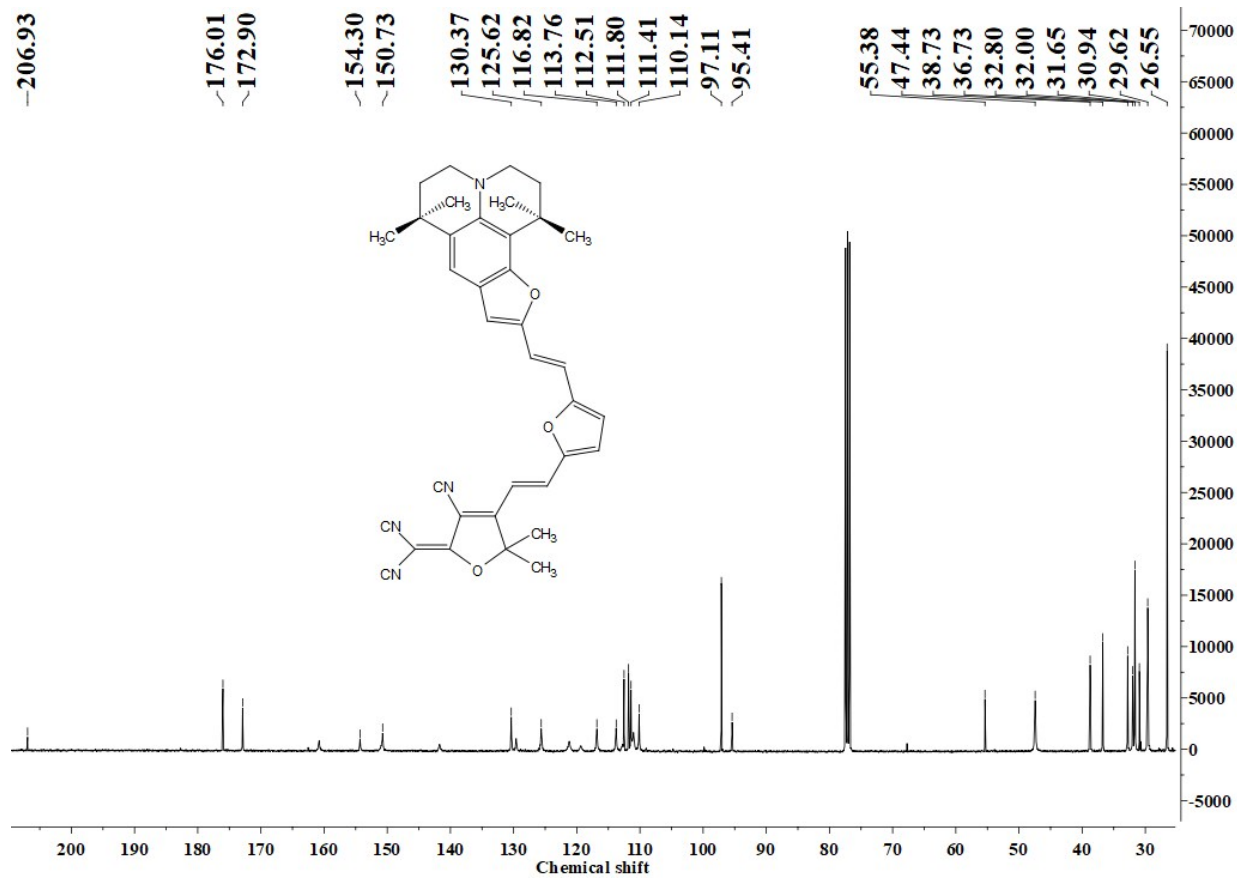

Fig. S12

## Theoretical calculations

To further disclose the role of the  $\pi$ -bridge on the properties of chromophores **C1** and **C2**, DFT calculations were conducted using hybrid B3LYP/6-31G\* geometries by means of Gaussian 03 (G03). All C–C double bonds outside the aromatic rings were set to be in trans-configuration and their geometries were optimized in vacuum. The electronic structure of the highest occupied molecular orbital (HOMO) and lowest unoccupied molecular orbital (LUMO) of **C1** and **C2** were given after the calculation. As shown in Figure S13, both in the ground and excited states, the electron density was asymmetric along the dipolar direction due to the intramolecular charge transfer. Although both chromophores have the same electron distribution behaves, careful contrast their orbital's electron density shows up some differences, at the HOMO state, the electron density in the furyl-vinylene of **C1** is richer than in the thienyl-vinylene of **C2**, and these electrons of **C1** could effectively transfer to the  $\pi$ -bridge and acceptor moiety end at the LUMO state.

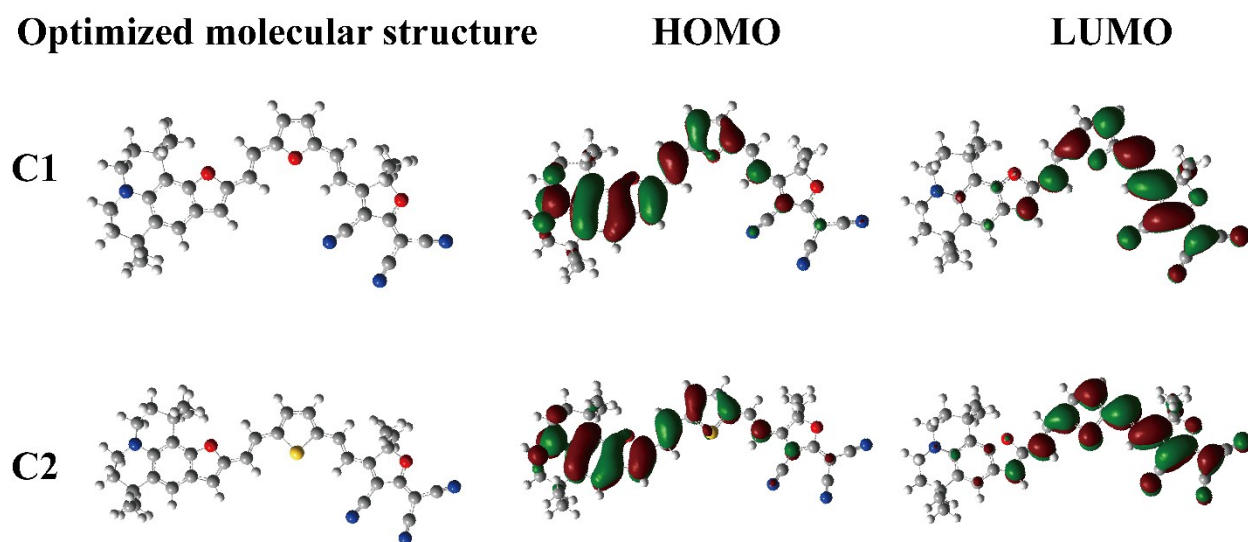

**Fig. S13** The frontier HOMO and LUMO orbitals of the C1 (Top) and C2 (bottom) at the B3LYP/6-31G\* level.
